# Supplementary material
Source: PubMed Central journal article supplement (PMC4585506)
Supplement: supp_bhu203_bhu203supp_figs.pdf [file supp_bhu203_bhu203supp_figs.pdf]

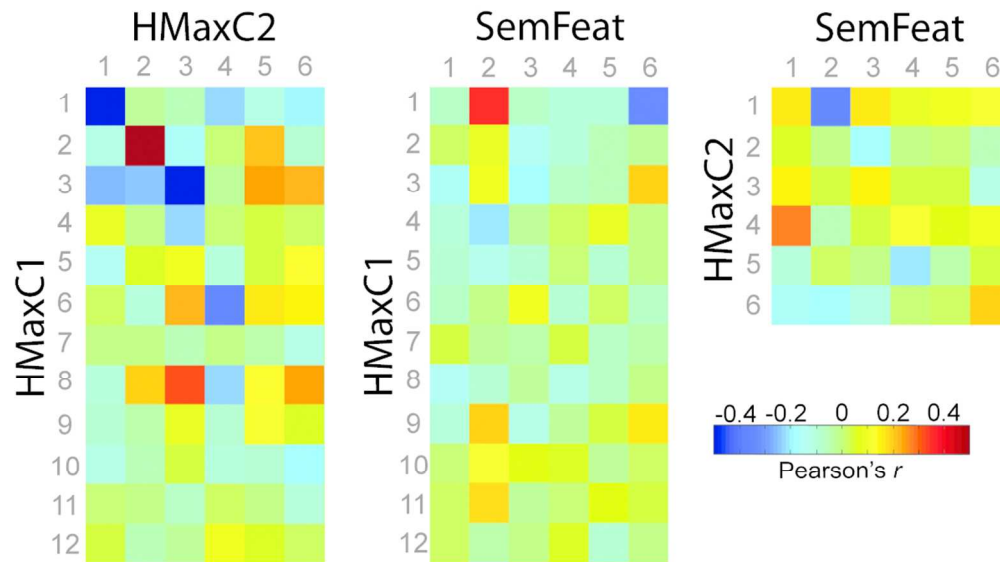

Figure S1. Correlations between model predictors.  
101x56mm (300 x 300 DPI)

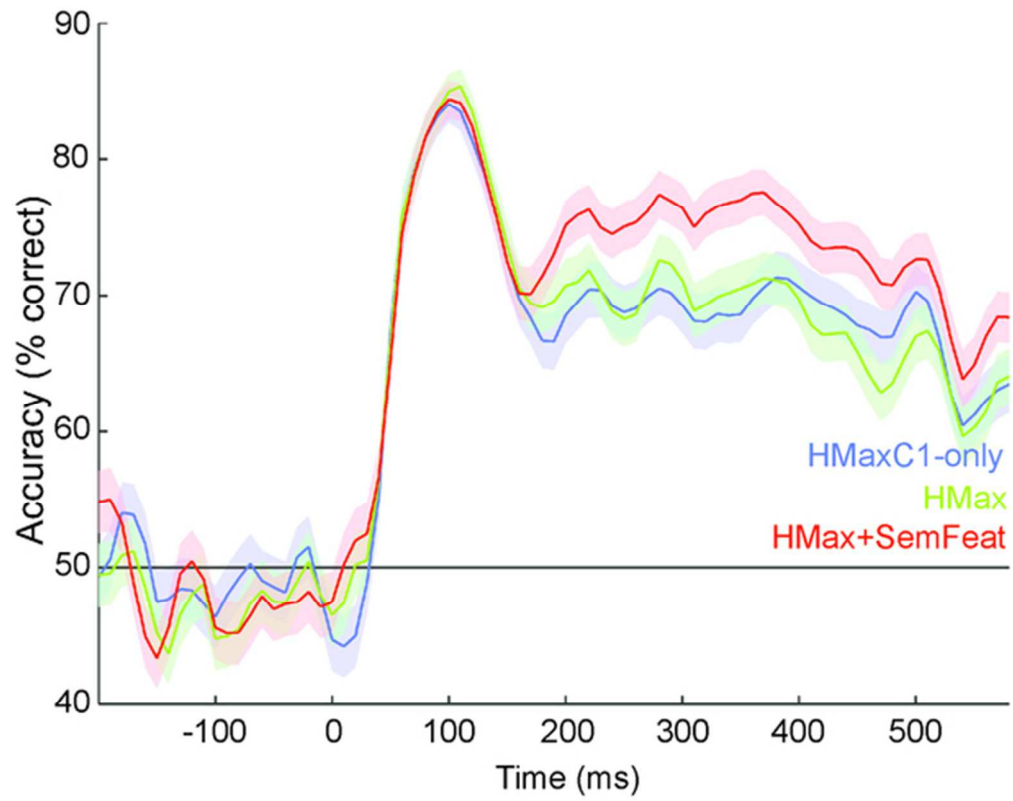

Figure S2. Control concept classification analysis showing accuracy over time for the HMaxC1-only, HMax, and HMax+SemFeat models with matched numbers of model predictors. Shaded areas show the standard errors of the mean.  
51x41mm (300 x 300 DPI)
